# Supplementary material
Source: PubMed Central journal article supplement (PMC6999570)
Supplement: ELSC-17-695-s001.pdf [file ELSC-17-695-s001.pdf]

**Production of added-value metabolites by *Yarrowia lipolytica* growing in olive mill wastewater-based media under aseptic and non-aseptic conditions**

Dimitris Sarris<sup>a</sup>, Nikolaos G. Stoforos<sup>a</sup>, Athanasios Mallouchos<sup>a</sup>, Ioannis K. Kookos<sup>b</sup>,  
Apostolis A. Koutinas<sup>a</sup>, George Aggelis<sup>c</sup>, Seraphim Papanikolaou<sup>a\*</sup>

<sup>a</sup> Department of Food Science and Human Nutrition, Agricultural University of Athens, 75 Iera Odos, 11855 – Athens, Greece

<sup>b</sup> Department of Chemical Engineering, University of Patras, 26504, Patras, Greece

<sup>c</sup> Department of Biology, Division of Genetics, Cell and Development Biology, University of Patras, 26504 – Patras, Greece

Running title: Olive mill wastewater-based media fermentation by *Yarrowia lipolytica*

\*Corresponding author: Dr. S. Papanikolaou, Associate Professor, Laboratory of Food Microbiology and Biotechnology, Department of Food Science and Human Nutrition, Agricultural University of Athens, Iera Odos 75 – Athens, Greece, e-mail:

[spapanik@aua.gr](mailto:spapanik@aua.gr), tel., fax: +30-210-5294700

## Supplementary material

a)

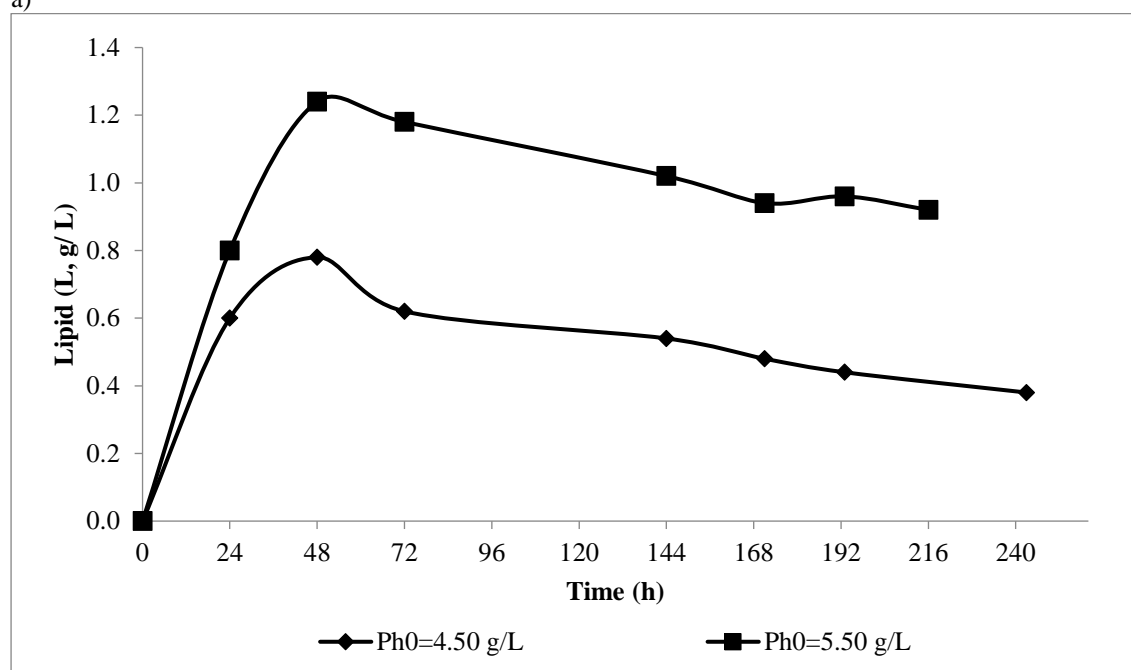

(b)

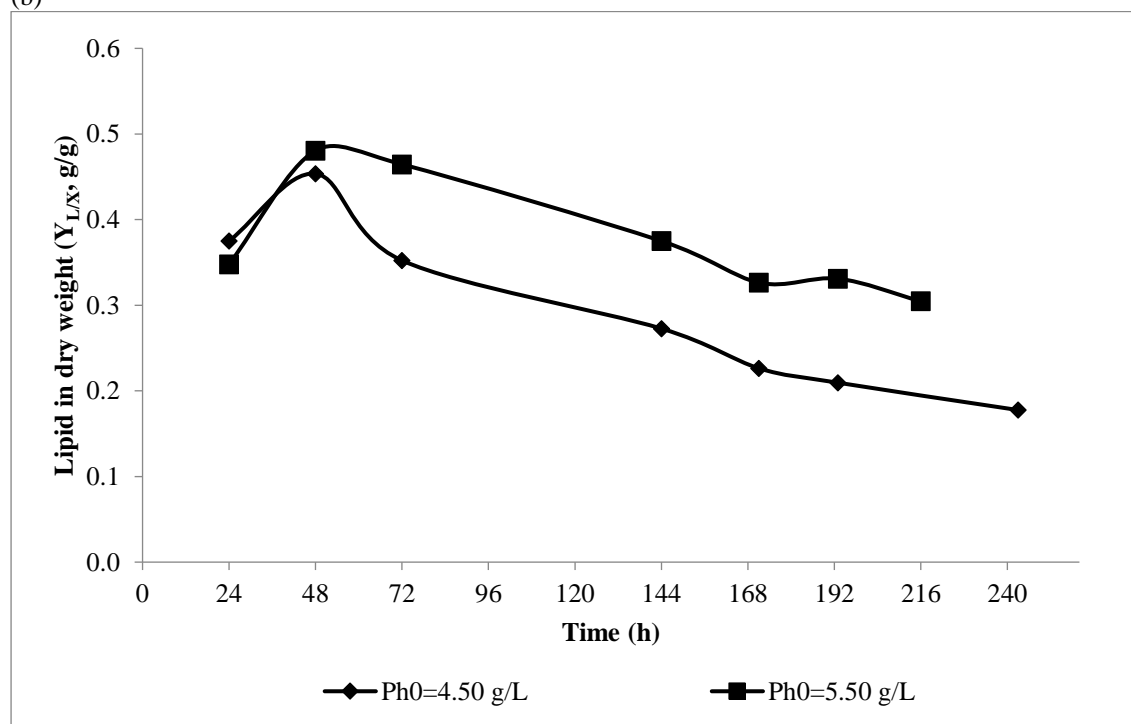

**Fig. S1** Cellular lipids (L, g/L) (a) and total cellular lipid in dry weight ( $Y_{LX}$ , g/g) (b) evolution during growth of *Yarrowia lipolytica* ACA-YC 5033 on OMW-based media ( $Glc_0=35.0\pm 2.0$  g/L,  $(NH_4)_2SO_4=0.50\pm 0.05$  g/L, yeast extract= $0.50\pm 0.05$  g/L; initial phenolic compounds concentration  $4.50\pm 0.35$  g/L and  $5.50\pm 0.40$  g/L) enriched with commercial glucose in nitrogen-limited conditions. Culture conditions: growth on 250-mL flasks at  $180\pm 5$  rpm, initial pH= $6.0\pm 0.1$ , pH ranging between 5.0 and 6.0, DOT>20% v/v, incubation temperature  $T=28$  °C. Each point is the mean value of two independent measurements.

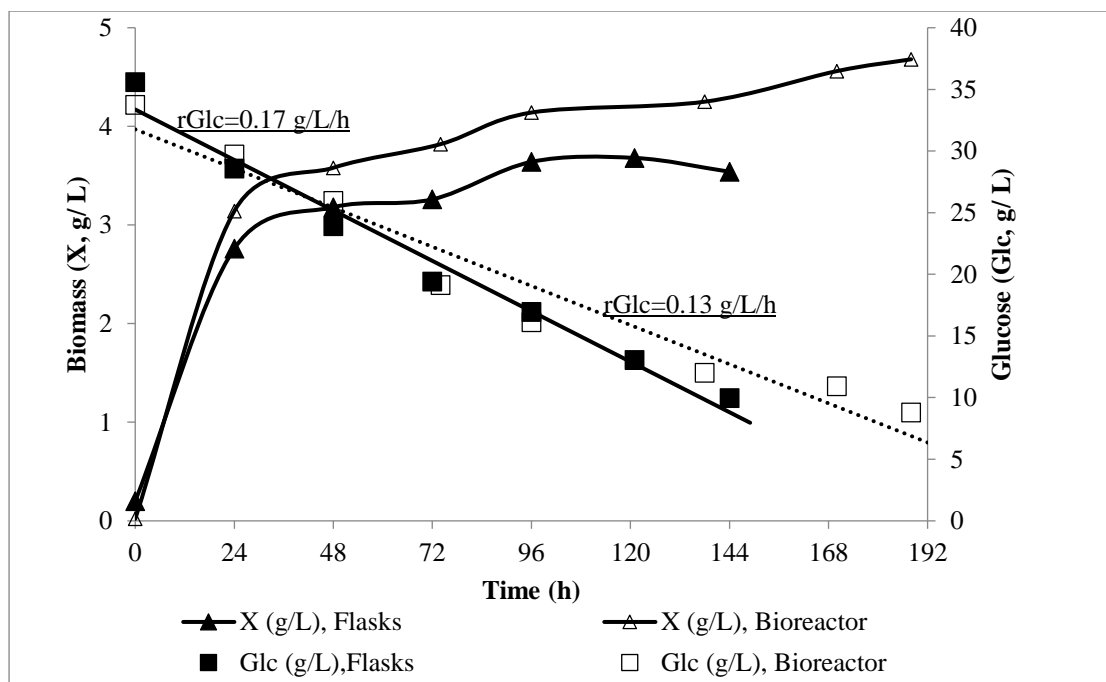

**Fig. S2** Comparison of *Yarrowia lipolytica* ACA-YC 5033 kinetics between aseptic shake-flask and aseptic batch-bioreactor cultures regarding biomass ( $X$ , g/L) and glucose (Glc, g/L) evolution on OMW-based media enriched with commercial glucose with initial phenolic compounds concentration  $2.90 \pm 0.25$  g/L. Culture conditions: growth on aseptic shake-flask 250-mL cultures agitated at  $180 \pm 5$  rpm,  $\text{Glc}_0 \sim 35.0$  g/L,  $(\text{NH}_4)_2\text{SO}_4 = 0.50 \pm 0.05$  g/L, yeast extract  $= 0.50 \pm 0.05$  g/L, initial pH  $= 6.0 \pm 0.1$ , pH ranging between 5.0 and 6.0, DOT  $> 20\%$  v/v, incubation temperature  $T = 28$  °C; aseptic batch bioreactor cultures agitated at 300 rpm,  $\text{Glc}_0 \sim 35.0$  g/L,  $(\text{NH}_4)_2\text{SO}_4 = 0.50 \pm 0.05$  g/L, yeast extract  $= 0.50 \pm 0.05$  g/L, initial pH  $= 6.0 \pm 0.1$ , pH ranging between 5.0 and 6.0, DOT  $> 20\%$  v/v, incubation temperature  $T = 28$  °C, and sparging of air at 1.0 vvm. Each point is the mean value of two independent measurements.

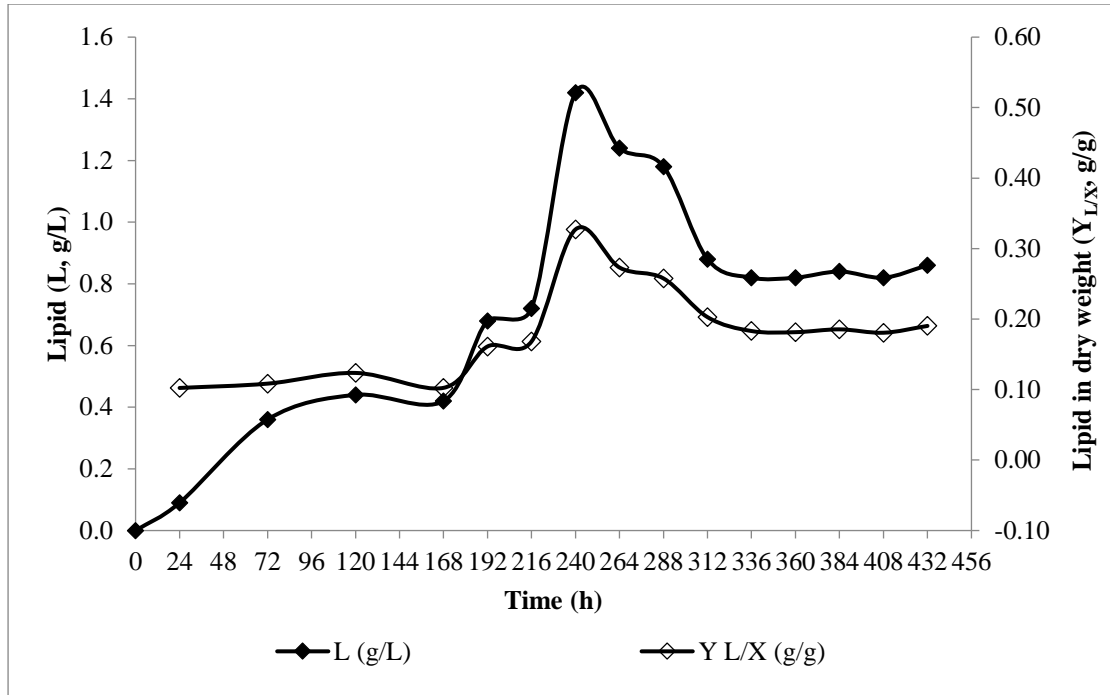

**Fig. S3** Cellular lipids (L, g/L) and total cellular lipid in dry weight (Y<sub>L/X</sub>, g/g) evolution during growth of *Yarrowia lipolytica* ACA-YC 5033 on OMW-based media (Glc<sub>0</sub>~80.0 g/L, (NH<sub>4</sub>)<sub>2</sub>SO<sub>4</sub>=0.50±0.05 g/L, yeast extract=0.50±0.05 g/L; initial phenolic compounds concentration 2.90±0.25 g/L) enriched with commercial glucose in nitrogen-limited conditions. Culture conditions as described in Fig. S1.

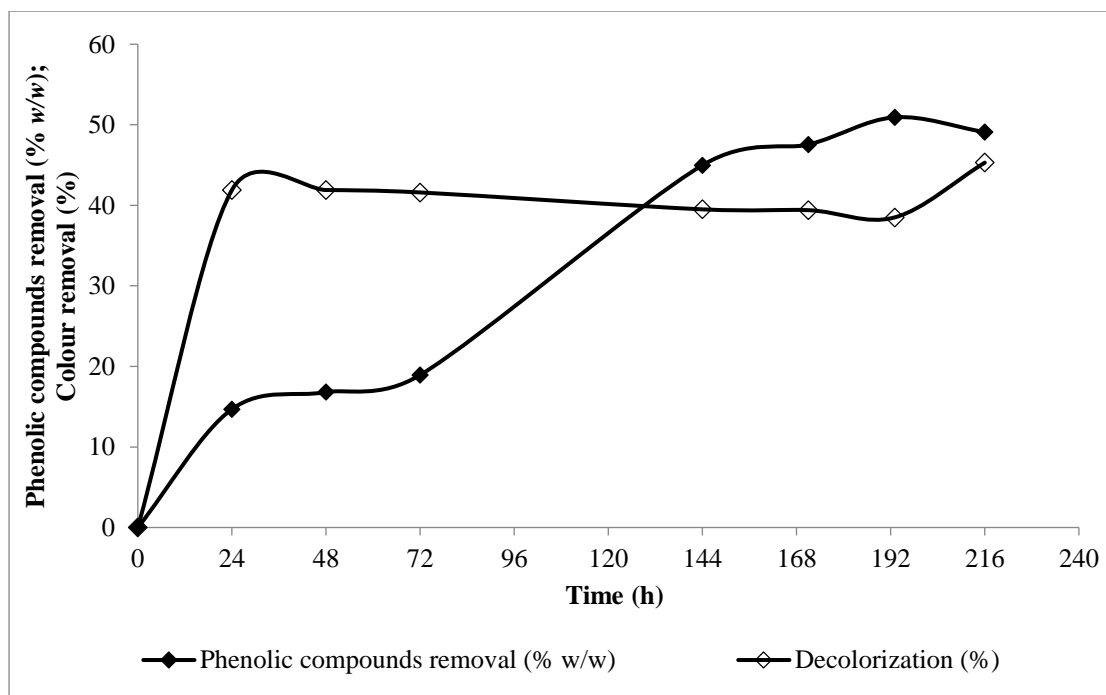

**Fig. S4** Phenolic compounds removal (% w/w) and color removal (%) during growth of *Y. lipolytica* strain ACA-YC 5033 on OMW-based media enriched with commercial glucose, with initial phenolic compounds concentration  $5.50 \pm 0.40$  g/L in nitrogen limited media. Culture conditions as described in Fig. S1.
